# Supplementary material for: Increased Exosomal MicroRNA-21 and MicroRNA-146a Levels in the Cervicovaginal Lavage Specimens of Patients with Cervical Cancer
Source: MDPI journal article supplement (doi:10.3390/ijms15010758), 2014-01-08

## Supplementary Information

**Figure S1.** Enriched exosomal miR-146a and miR-21 in cervicovaginal lavage specimens of cervical cancer patients. We determined the miR-146a and miR-21 level in cervicovaginal lavage specimens of the normal subjects with HPV-negative ( $n = 32$ ), subjects with HPV-positive ( $n = 25$ ), or cervical cancer patients ( $n = 45$ ). The relative amounts of miR-146a (A) or miR-21 (B) in the supernatant of specimens were examined by RT-qPCR; (C) and (D): The difference of miR-146a (C) or miR-21 (D) in the supernatant and in exosomes of specimens. The ratio of miR-146a or miR-21 in the supernatant to in exosomes in the normal HPV-negative group was designated as “1”. All other samples were expressed as a relative value according to the ratio of in the supernatant to in exosomes. All experiments were performed in triplicate. Statistical significance was considered with a  $p < 0.01$ (\*\*).

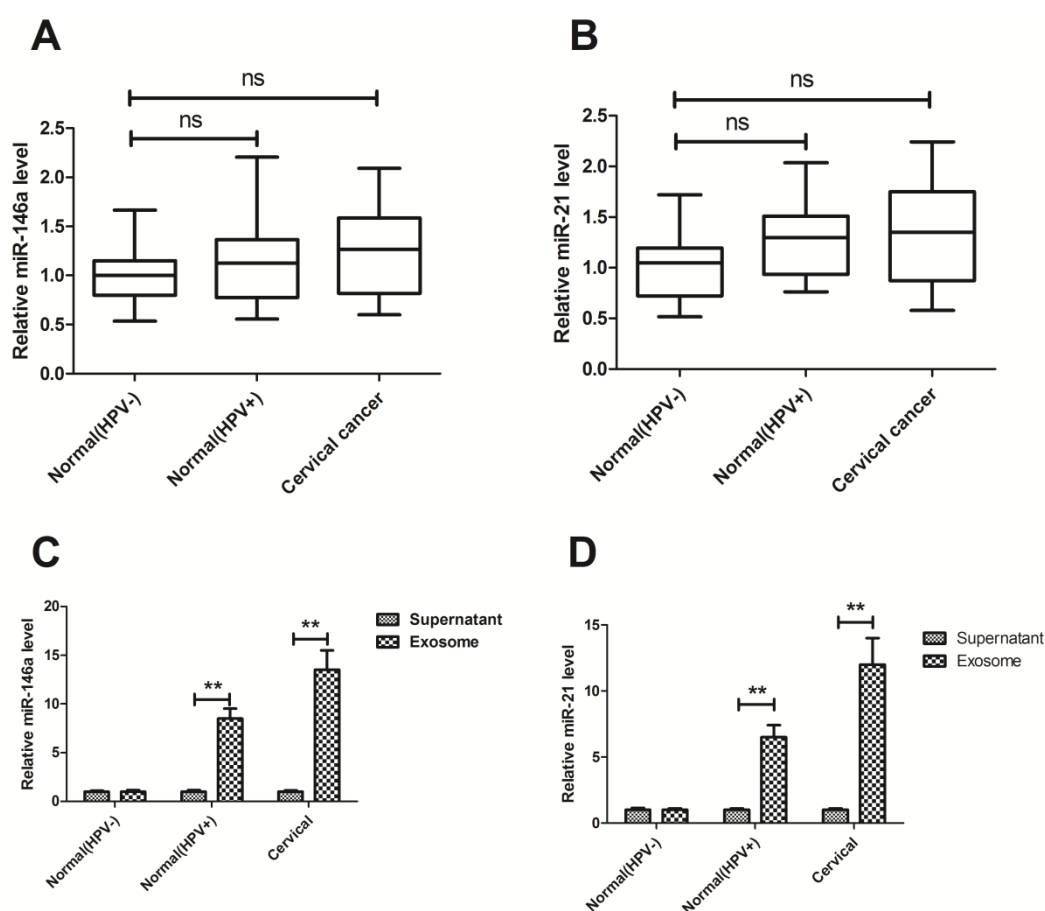

Supplement: s1 [file s1]
